# Supplementary material for: Single and Combined Effects of Chlorpyrifos and Glyphosate on the Brain of Common Carp: Based on Biochemical and Molecular Perspective
Source: MDPI journal article supplement (doi:10.3390/ijms241612934), 2023-08-18
Supplement: s1 [file s1]

## 1. Supplementary Tables

**Table S1.** CPF and GLY contents in the brain of common carp.

| Exposure time (d) | Exposure | Contents of CPF and GLY in the brain(ng / g) |              |
|-------------------|----------|----------------------------------------------|--------------|
|                   |          | CPF                                          | GLY          |
| 14                | CTRL     | -                                            | -            |
|                   | CPF      | 2.59±0.47                                    | -            |
|                   | GLY      | -                                            | 113.61±9.18  |
|                   | MIX      | 1.28±0.37                                    | 80.47±7.24   |
| 21                | CTRL     | -                                            | -            |
|                   | CPF      | 4.07±1.08                                    | -            |
|                   | GLY      | -                                            | 177.82±29.25 |
|                   | MIX      | 2.17±0.64                                    | 104.78±11.30 |

**Table S2.** Summary of transcriptome sequencing data

| Sample | Raw Reads(bp) | Clean Data (bp) | Clean Reads % | Total Mapped    | Uniquely Mapped | Q20 (%) | Q30 (%) | GC Content(%) |
|--------|---------------|-----------------|---------------|-----------------|-----------------|---------|---------|---------------|
| CTRL-1 | 51456144      | 49997446        | 97.17         | 47391426(94.79) | 45882691(96.82) | 100     | 98.65   | 48.5          |
| CTRL-2 | 57312482      | 55700310        | 97.19         | 52828442(94.84) | 51025436(96.59) | 100     | 98.65   | 48.5          |
| CTRL-3 | 56283346      | 54737816        | 97.25         | 51981699(94.96) | 50182531(96.54) | 100     | 98.7    | 48.5          |
| CPF-1  | 49406378      | 48063430        | 97.28         | 45577031(94.83) | 44011586(96.57) | 100     | 98.75   | 48.5          |
| CPF-2  | 56732800      | 55193288        | 97.29         | 52302296(94.76) | 50607868(96.76) | 100     | 98.7    | 48            |
| CPF-3  | 47410510      | 46203714        | 97.45         | 43876286(94.96) | 42415255(96.67) | 100     | 98.8    | 48            |
| GLY-1  | 55710116      | 54363108        | 97.58         | 51603790(94.92) | 49828727(96.56) | 100     | 98.9    | 48.5          |
| GLY-2  | 52372360      | 51084614        | 97.54         | 48507065(94.95) | 46895640(96.68) | 100     | 98.85   | 48.5          |
| GLY-3  | 47151062      | 45938928        | 97.43         | 43460902(94.61) | 41996499(96.63) | 100     | 98.8    | 48.5          |
| MIX-1  | 45872406      | 44589422        | 97.2          | 42320019(94.91) | 41018375(96.92) | 100     | 98.65   | 48            |
| MIX-2  | 47593102      | 46254978        | 97.19         | 43966057(95.05) | 42564833(96.81) | 100     | 98.7    | 48.5          |
| MIX-3  | 45885388      | 48063430        | 97.35         | 42408938(94.94) | 41155343(97.04) | 100     | 98.75   | 48.5          |

**TableS3.** Hub genes in the CPF, GLY, and MIX groups compared to the CTRL group.

| Group | Symbol | Name                                               | KEGG_Orthology_Web                                                                                                  |
|-------|--------|----------------------------------------------------|---------------------------------------------------------------------------------------------------------------------|
| CPF   | cdc45  | cell division control protein 45                   | <a href="https://www.genome.jp/dbget-bin/www_bget?ko:K06628">https://www.genome.jp/dbget-bin/www_bget?ko:K06628</a> |
|       | mcm2   | DNA replication licensing factor MCM2              | <a href="https://www.genome.jp/dbget-bin/www_bget?ko:K02540">https://www.genome.jp/dbget-bin/www_bget?ko:K02540</a> |
|       | mcm3   | DNA replication licensing factor MCM3              | <a href="https://www.genome.jp/dbget-bin/www_bget?ko:K02541">https://www.genome.jp/dbget-bin/www_bget?ko:K02541</a> |
|       | mcm6   | DNA replication licensing factor MCM6              | <a href="https://www.genome.jp/dbget-bin/www_bget?ko:K02542">https://www.genome.jp/dbget-bin/www_bget?ko:K02542</a> |
|       | fos    | proto-oncogene protein c-fos                       | <a href="https://www.genome.jp/dbget-bin/www_bget?ko:K04379">https://www.genome.jp/dbget-bin/www_bget?ko:K04379</a> |
|       | akt    | non-specific serine/threonine protein kinase       | <a href="https://www.genome.jp/dbget-bin/www_bget?ko:K04456">https://www.genome.jp/dbget-bin/www_bget?ko:K04456</a> |
| GLY   | stat3  | signal transducer and activator of transcription 3 | <a href="https://www.genome.jp/dbget-bin/www_bget?ko:K04692">https://www.genome.jp/dbget-bin/www_bget?ko:K04692</a> |
|       | myc    | Myc proto-oncogene protein                         | <a href="https://www.genome.jp/dbget-bin/www_bget?ko:K04377">https://www.genome.jp/dbget-bin/www_bget?ko:K04377</a> |
|       | fos    | proto-oncogene protein c-fos                       | <a href="https://www.genome.jp/dbget-bin/www_bget?ko:K04379">https://www.genome.jp/dbget-bin/www_bget?ko:K04379</a> |
|       | cdk6   | cyclin-dependent kinase 6                          | <a href="https://www.genome.jp/dbget-bin/www_bget?ko:K02091">https://www.genome.jp/dbget-bin/www_bget?ko:K02091</a> |
|       | prkdc  | DNA-dependent protein kinase catalytic subunit     | <a href="https://www.genome.jp/dbget-bin/www_bget?ko:K06642">https://www.genome.jp/dbget-bin/www_bget?ko:K06642</a> |
|       | akt    | non-specific serine/threonine protein kinase       | <a href="https://www.genome.jp/dbget-bin/www_bget?ko:K04456">https://www.genome.jp/dbget-bin/www_bget?ko:K04456</a> |
| MIX   | lck    | lymphocyte cell-specific protein tyrosine kinase   | <a href="https://www.genome.jp/dbget-bin/www_bget?ko:K05856">https://www.genome.jp/dbget-bin/www_bget?ko:K05856</a> |
|       | stat3  | signal transducer and activator of transcription 3 | <a href="https://www.genome.jp/dbget-bin/www_bget?ko:K04692">https://www.genome.jp/dbget-bin/www_bget?ko:K04692</a> |
|       | stat1  | signal transducer and activator of transcription 1 | <a href="https://www.genome.jp/dbget-bin/www_bget?ko:K11220">https://www.genome.jp/dbget-bin/www_bget?ko:K11220</a> |
|       | jak2   | Janus kinase 2                                     | <a href="https://www.genome.jp/dbget-bin/www_bget?ko:K04447">https://www.genome.jp/dbget-bin/www_bget?ko:K04447</a> |
|       | jak1   | Janus kinase 1                                     | <a href="https://www.genome.jp/dbget-bin/www_bget?ko:K11217">https://www.genome.jp/dbget-bin/www_bget?ko:K11217</a> |
|       | fos    | proto-oncogene protein c-fos                       | <a href="https://www.genome.jp/dbget-bin/www_bget?ko:K04379">https://www.genome.jp/dbget-bin/www_bget?ko:K04379</a> |

**Table S4.** Primer sequences used for qPCR analysis

| Gene            | Sequence (5'-3')       | Product Size(bp) |
|-----------------|------------------------|------------------|
| <i>kcnn4</i>    | F GGGAGGACAACTTGGGAGG  | 118              |
|                 | R AAGAACATGAGGGCCGACAG |                  |
| <i>adcyap1a</i> | F GAAGGGAAATTGCGGTCGTG | 165              |
|                 | R GGACGGATTTGAGGCGAGAT |                  |
| <i>calca</i>    | F CGAGGAAAACAGCCTGGGTA | 114              |
|                 | R TTGGTGCCTGGATACGTCTG |                  |
| <i>ddit4</i>    | F CAGACGCGCACTTAGACTGA | 149              |
|                 | R CGGAGGAGACCAAACGCTTA |                  |
| <i>ncam3</i>    | F CGGTGTGGTCGGGATTGTAA | 193              |
|                 | R GAGGCCACTCAGCTTCATGT |                  |
| <i>plxnc1</i>   | F GTTCAATGAATCGGCGGCTC | 156              |
|                 | R CCGCTTCGCTTCATGTTGTC |                  |
| $\beta$ -actin  | F TGCTCTGTATGGCGCATTGA | 137              |
|                 | R AGGGCAAAGTGGTAAACGCT |                  |

## 2. Supplementary Figures

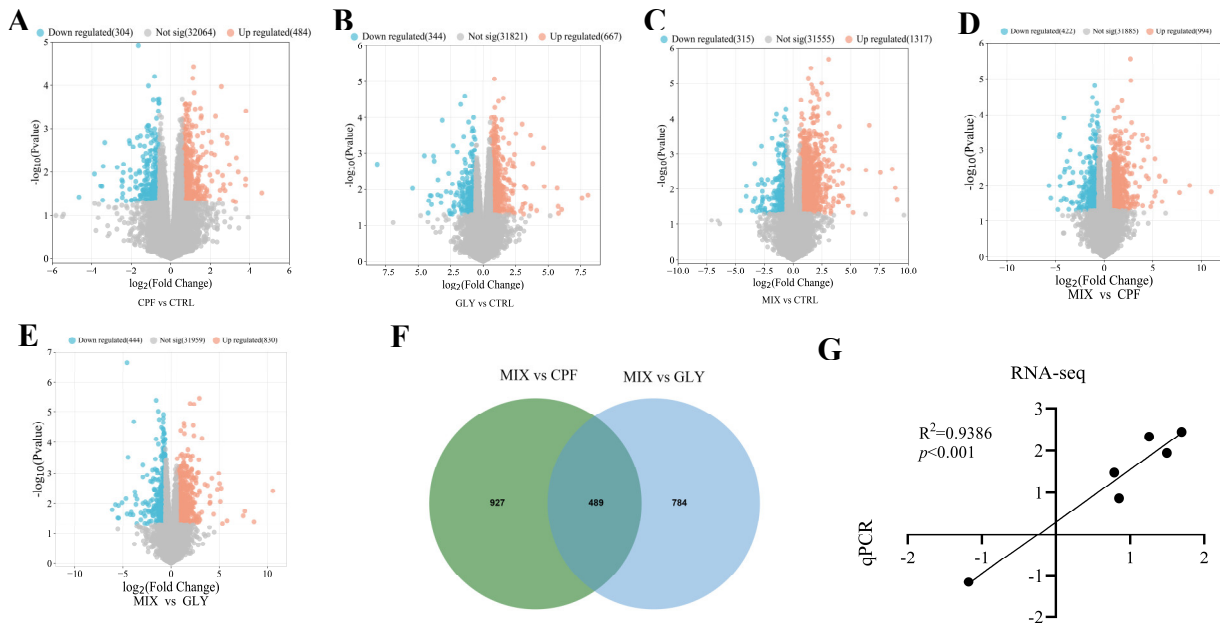

**Figure S1.** Transcription changes after CPF, GLY, and MIX exposure. (A) Volcano graphs of DEGs in the brain of carp following CPF exposure. (B) Volcano graphs of DEGs in the brain of carp following GLY exposure. (C) Volcano graphs of DEGs in the brain of carp following MIX exposure. Red dots denote genes that are considerably upregulated, blue dots denote genes that are significantly downregulated, and gray dots denote genes that are not significantly changed when compared to CTRL groups. (D) Volcano plot for MIX vs. CPF DEGs. (E) Volcano plot for MIX vs. GLY DEGs. (F) Venn diagram illustrating DEG overlap for the MIX compared with CPF groups and MIX compared with GLY groups. (G) Correlational analysis of the qPCR and RNA-seq results.

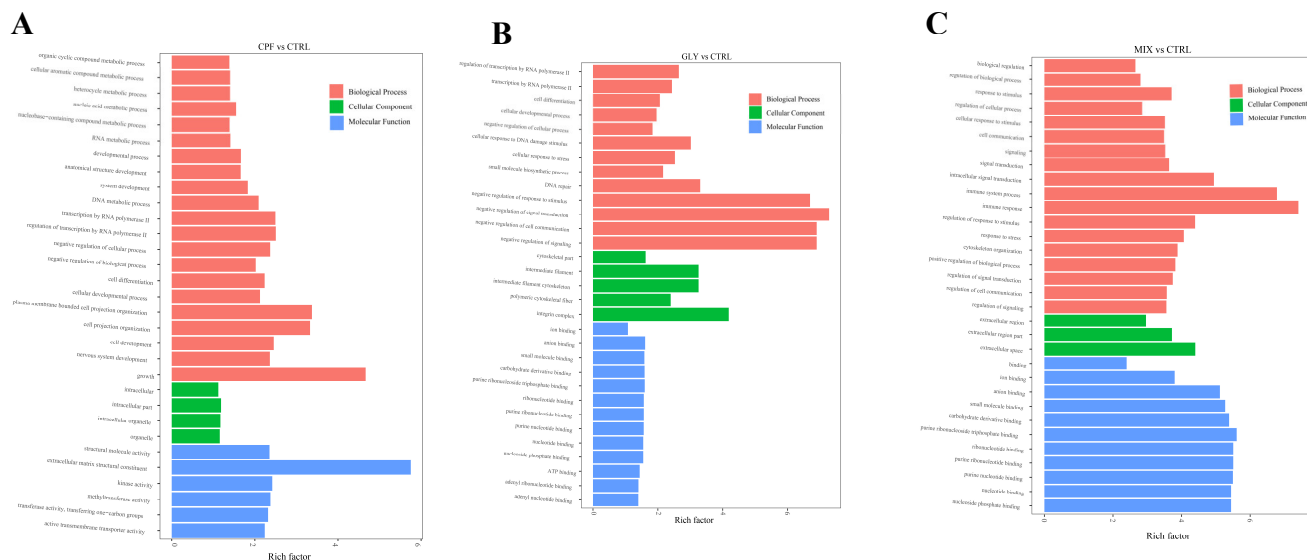

**Figure S2.** GO analysis of DEGs in CPF, GLY, and MIX treatment groups. (A-C) The DEGs in the CPF, GLY, and MIX group were classified by GO (The GO categories' functions were divided into biological processes, cellular components, and molecular functions).
